# Supplementary material
Source: Research Square preprint supplement (doi:10.21203/rs.3.rs-8955218/v1)
Supplement: Supplementary file 1 [file 60014f1edded8a5f4824b248.docx]

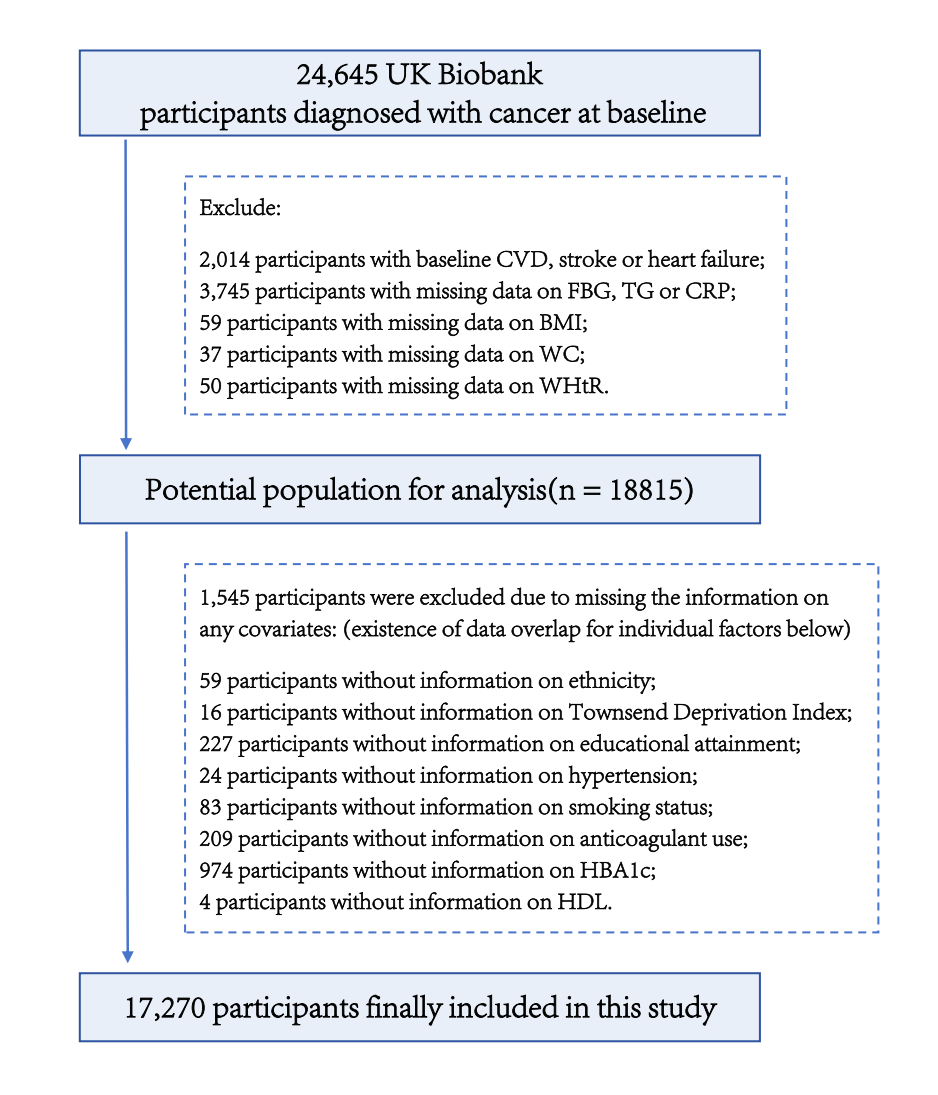


**Fig.S1** Flowchart of study participants

**
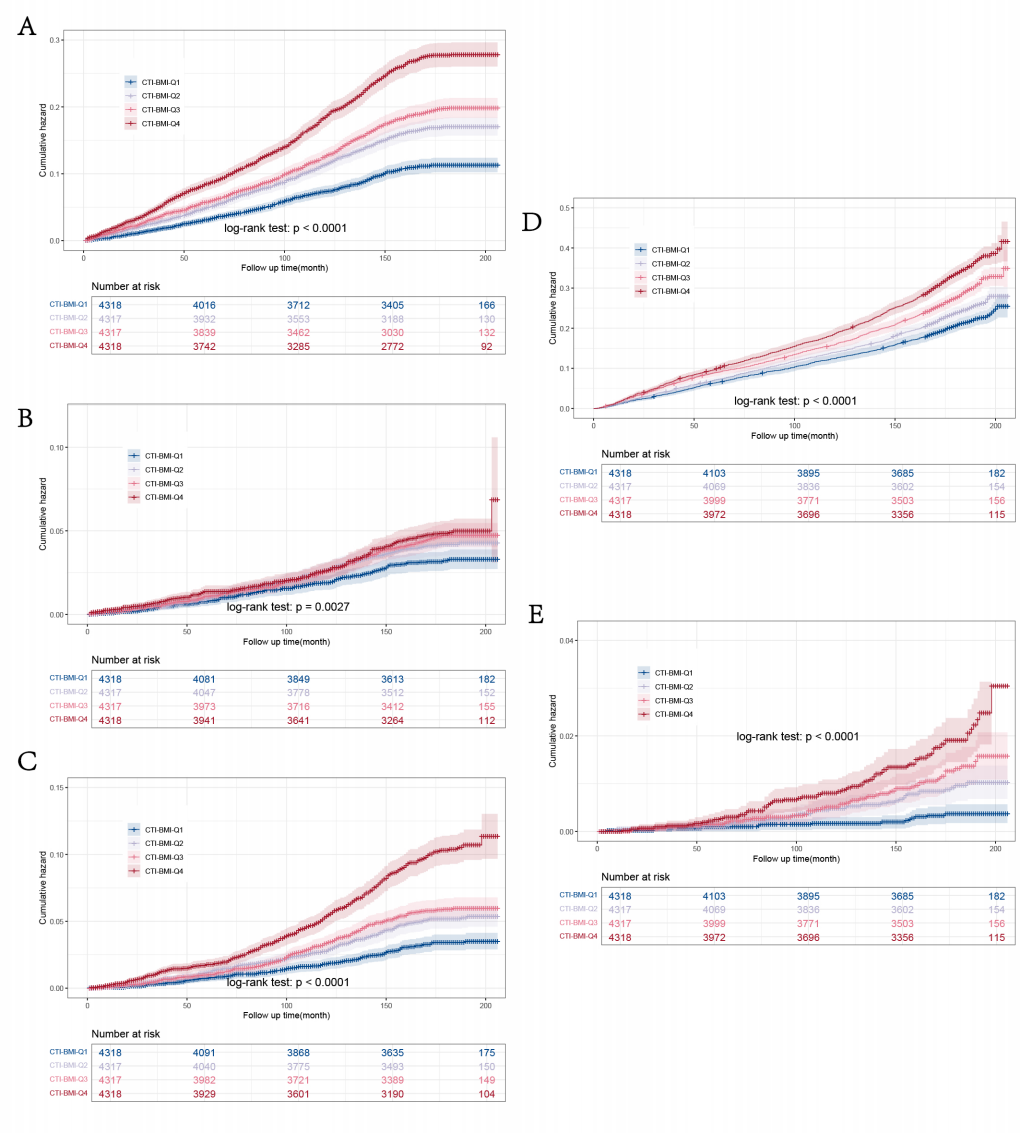
**

**Fig.S2** Kaplan-Meier plots of outcomes by CTI-BMI quartiles. (A) Associations of CTI-BMI and incidence CVD. (B) Associations of CTI-BMI and incidence stroke. (C) Associations of CTI-BMI and incidence heart failure. (D) Associations of CTI-BMI and all-cause mortality. (E) Associations of CTI-BMI and CVD-related mortality.


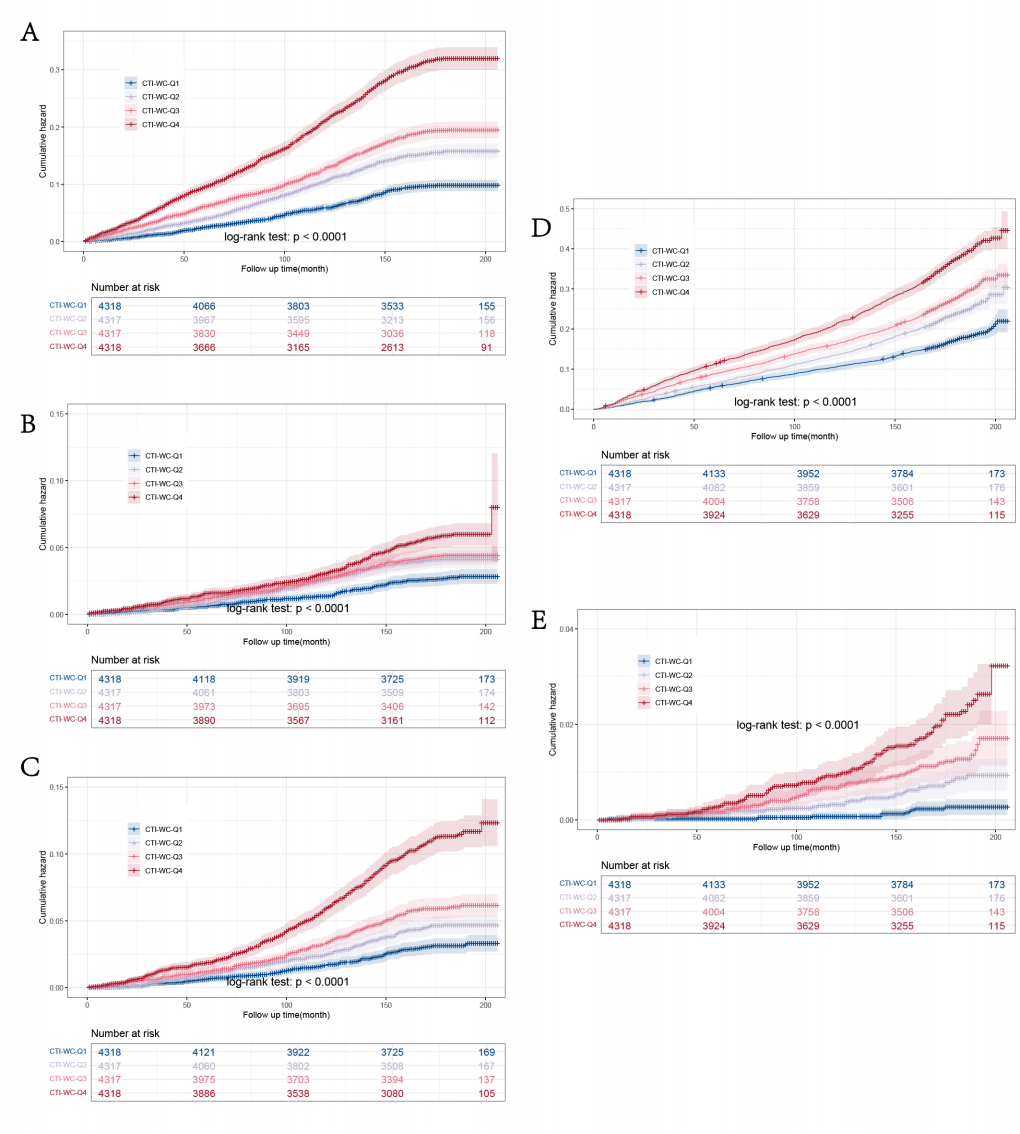


**Fig.S3** Kaplan-Meier plots of outcomes by CTI-WC quartiles. (A) Associations of CTI-WC and incidence CVD. (B) Associations of CTI-WC and incidence stroke. (C) Associations of CTI-WC and incidence heart failure. (D) Associations of CTI-WC and all-cause mortality. (E) Associations of CTI-WC and CVD-related mortality.


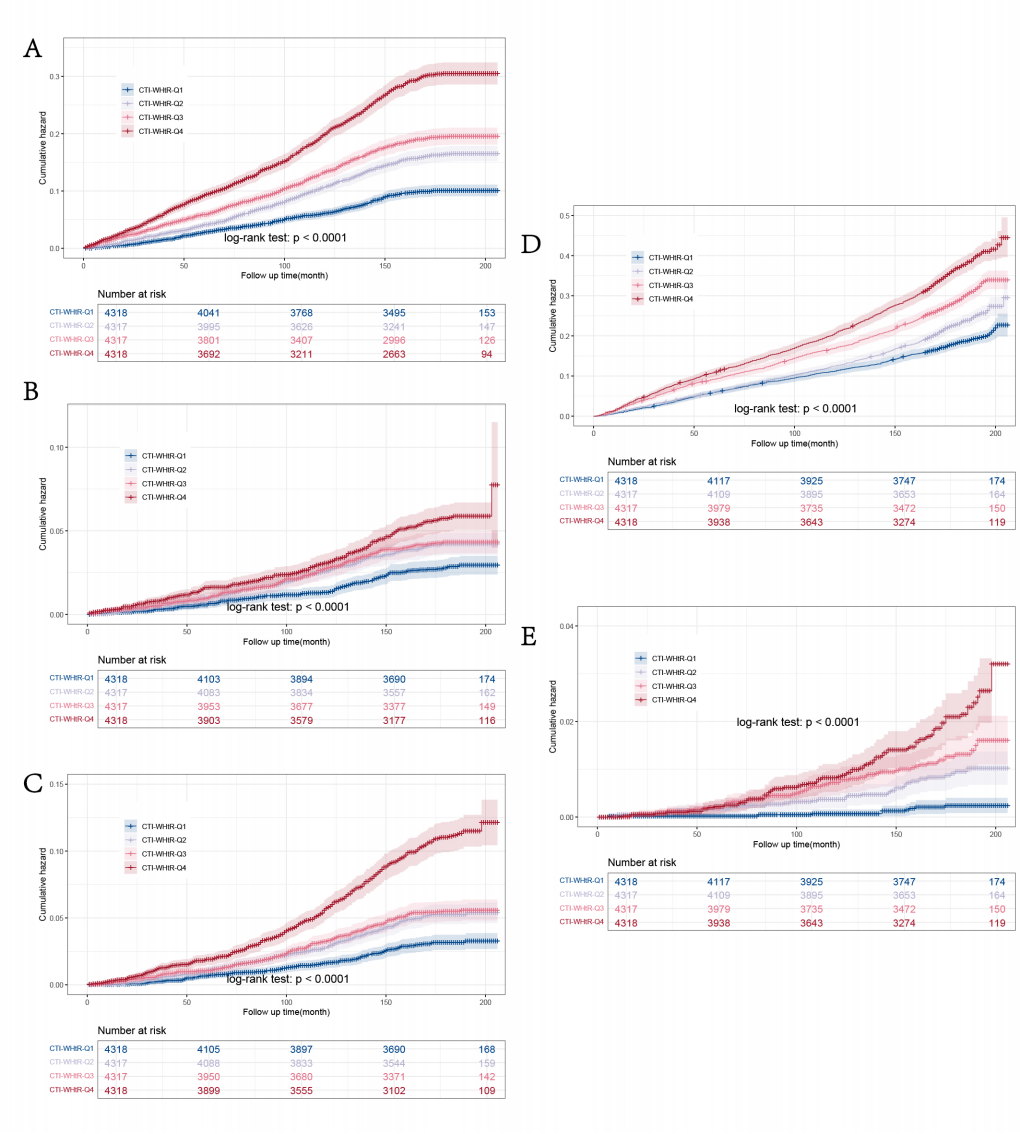


**Fig.S4** Kaplan-Meier plots of outcomes by CTI-WHtR quartiles. (A) Associations of CTI-WHtR and incidence CVD. (B) Associations of CTI-WHtR and incidence stroke. (C) Associations of CTI-WHtR and incidence heart failure. (D) Associations of CTI-WHtR and all-cause mortality. (E) Associations of CTI-WHtR and CVD-related mortality.


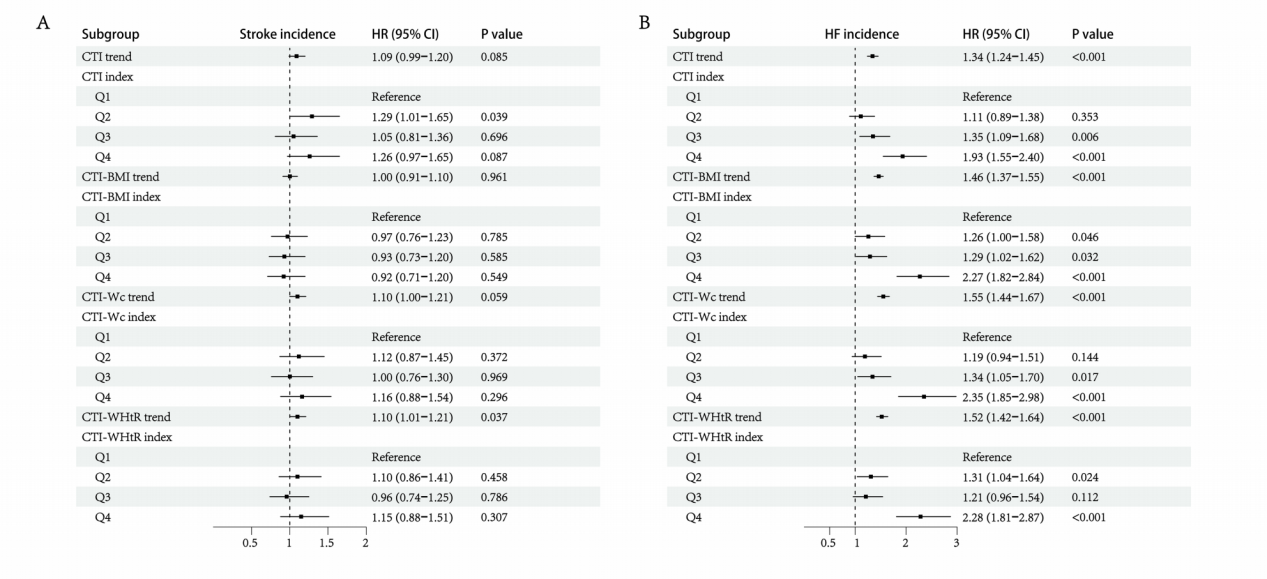


**Fig.S5** Forest plot of CTI and its obesity-related derivatives in relation to stroke events (A), and heart failure events (B) using fully adjusted Cox proportional hazards model.


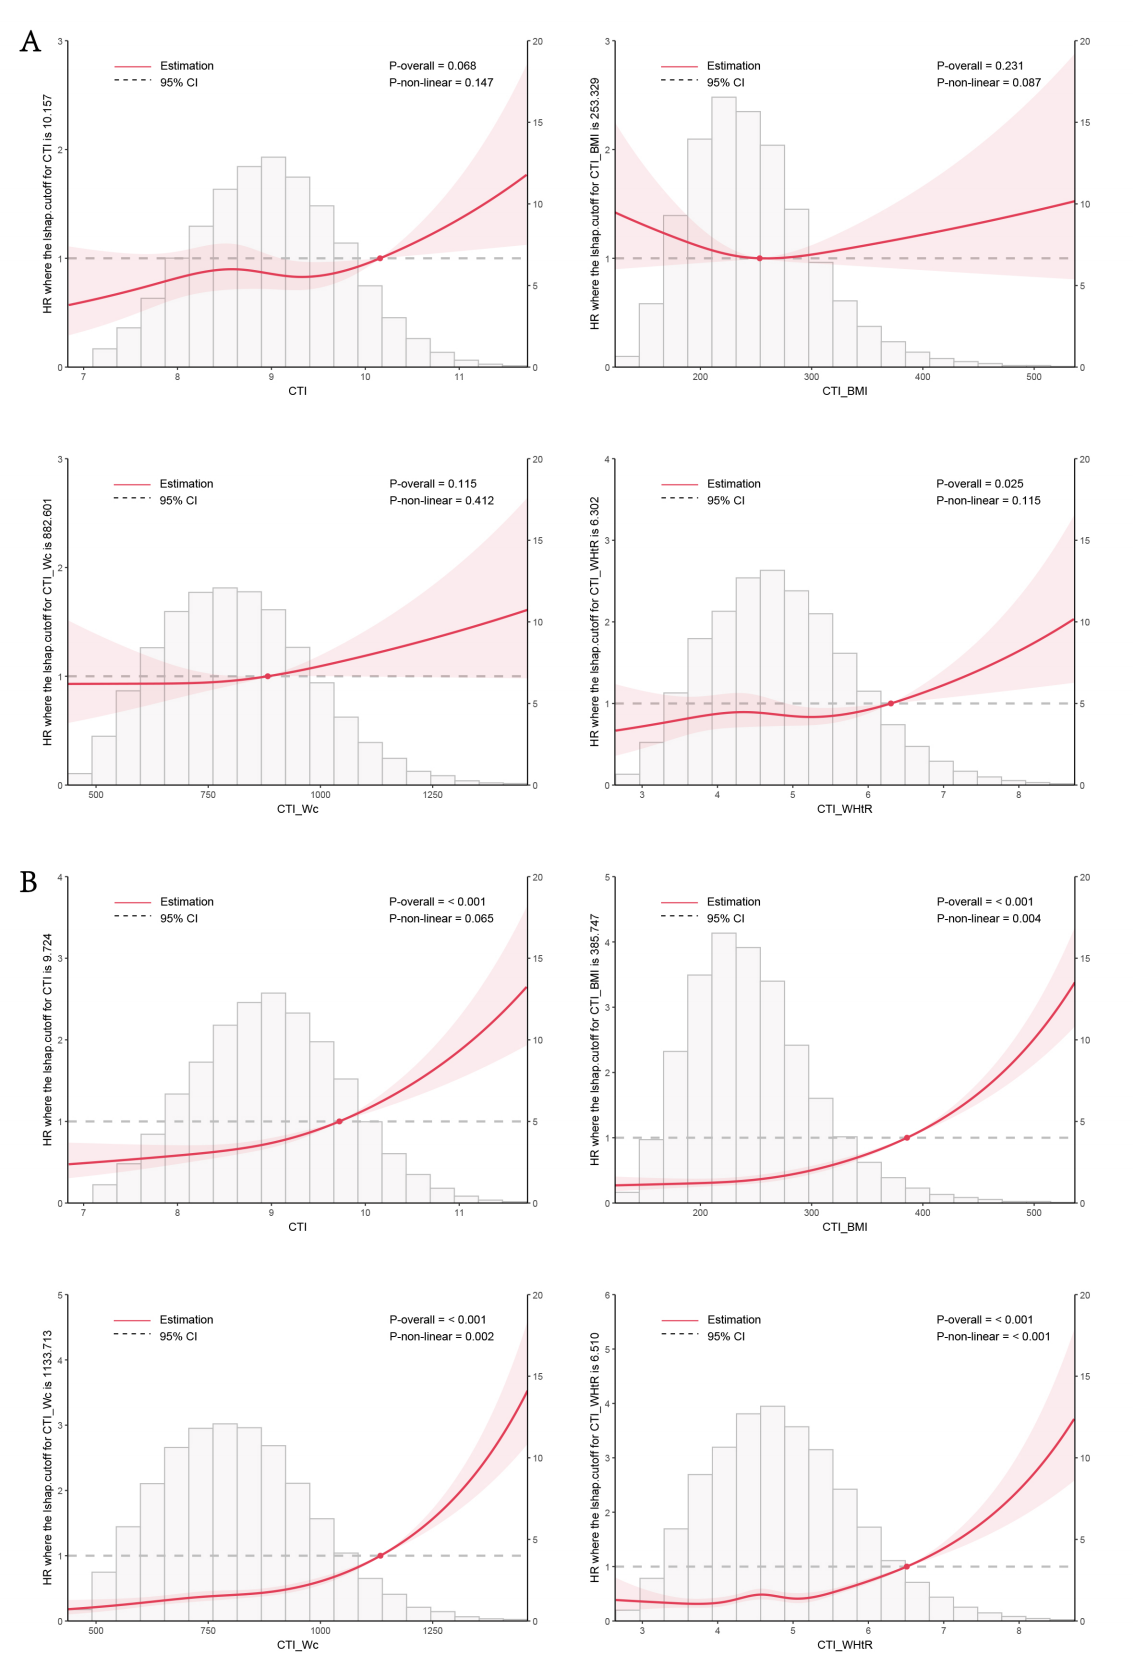


Fig.S6 Associations between CTI and its obesity-related derivatives with stroke events (A), and heart failure events (B) evaluated by RCS after fully adjustment for the covariates.

| Variables | VIF |
| --- | --- |
| LDL/HDL ratio | 6.399035422 |
| Hypertension: Yes | 2.740215104 |
| Age group: 66–70 | 2.231866521 |
| Educational attainment: College or University degree | 2.162737499 |
| Age group: 62–65 | 2.130431479 |
| Age group: 56–61 | 2.045234393 |
| Educational attainment: None of the above | 2.035933831 |
| Smoking status: Never | 2.003325827 |
| Sex: Male | 1.898447650 |
| Educational attainment: CSE or equivalent | 1.670221605 |
| Educational attainment: NVQ or HND or HNC or equivalent | 1.560728234 |
| Townsend Deprivation Index | 1.306128531 |
| Anticoagulant use: Yes | 1.253433223 |
| Diabetes mellitus: Yes | 1.138458116 |
| Alcohol consumption: Never | 1.117694759 |
| Assessment centre: Scotland | 1.080737268 |

**Table S1：VIF Diagnostics for Multicollinearity Among Covariates**

To mitigate lipid collinearity, LDL and HDL were replaced by their ratio, which is clinically recommended.

Age was categorized into quartile-based groups: 40–55 (reference), 56–61, 62–65, and 66–70 years, to balance clinical interpretability and statistical collinearity

| Type | Model 1 | | | | Model 2 | | | | Model 3 | | | |
| --- | --- | --- | --- | --- | --- | --- | --- | --- | --- | --- | --- | --- |
| HR1 (95% CI1) | P-value | HR (95% CI)  for trend | P for trend | HR (95% CI) | P-value | HR (95% CI)  for trend | P for trend | HR (95% CI) | P-value | HR (95% CI)  for trend | P for trend |
| CTI index |  |  |  |  |  |  |  |  |  |  |  |  |
| Q1 | Reference |  | 1.38 (1.33, 1.43) | <.001 | Reference |  | 1.28 (1.23, 1.33) | <.001 | Reference |  | 1.18 (1.12, 1.23) | <.001 |
| Q2 | 1.48 (1.31, 1.67) | <.001 | 1.23 (1.09, 1.40) | <.001 | 1.16 (1.02, 1.31) | 0.023 |
| Q3 | 1.80 (1.60, 2.03) | <.001 | 1.43 (1.27, 1.62) | <.001 | 1.26 (1.11, 1.43) | <.001 |
| Q4 | 2.33 (2.08, 2.62) | <.001 | 1.83 (1.63, 2.06) | <.001 | 1.48 (1.30, 1.69) | <.001 |
| CTI-BMI index |  |  |  |  |  |  |  |  |  |  |  |  |
| Q1 | Reference |  | 1.36 (1.32, 1.41) | <.001 | Reference |  | 1.34 (1.30, 1.39) | <.001 | Reference |  | 1.23 (1.18, 1.28) | <.001 |
| Q2 | 1.51 (1.33, 1.71) | <.001 | 1.21 (1.07, 1.37) | 0.002 | 1.12 (0.99, 1.27) | 0.082 |
| Q3 | 1.74 (1.54, 1.97) | <.001 | 1.29 (1.14, 1.46) | <.001 | 1.11 (0.97, 1.26) | 0.127 |
| Q4 | 2.47 (2.20, 2.77) | <.001 | 1.97 (1.75, 2.22) | <.001 | 1.52 (1.33, 1.73) | <.001 |
| CTI-Wc index |  |  |  |  |  |  |  |  |  |  |  |  |
| Q1 | Reference |  | 1.56 (1.50, 1.61) | <.001 | Reference |  | 1.41 (1.35, 1.46) | <.001 | Reference |  | 1.29 (1.23, 1.35) | <.001 |
| Q2 | 1.61 (1.41, 1.83) | <.001 | 1.26 (1.10, 1.44) | <.001 | 1.17 (1.02, 1.34) | 0.023 |
| Q3 | 2.00 (1.77, 2.27) | <.001 | 1.35 (1.18, 1.54) | <.001 | 1.16 (1.01, 1.33) | 0.034 |
| Q4 | 3.29 (2.92, 3.70) | <.001 | 2.16 (1.90, 2.45) | <.001 | 1.66 (1.44, 1.91) | <.001 |
| CTI-WHtR index |  |  |  |  |  |  |  |  |  |  |  |  |
| Q1 | Reference |  | 1.50 (1.45, 1.55) | <.001 | Reference |  | 1.40 (1.35, 1.45) | <.001 | Reference |  | 1.28 (1.23, 1.34) | <.001 |
| Q2 | 1.63 (1.43, 1.85) | <.001 | 1.26 (1.11, 1.44) | <.001 | 1.16 (1.02, 1.33) | 0.024 |
| Q3 | 1.96 (1.73, 2.22) | <.001 | 1.35 (1.19, 1.53) | <.001 | 1.17 (1.02, 1.34) | 0.021 |
| Q4 | 3.04 (2.70, 3.42) | <.001 | 2.14 (1.89, 2.42) | <.001 | 1.65 (1.44, 1.89) | <.001 |

**Table S2：Association of CTI-related indices with total CVD in cancer survivors.**

1HR = Hazard Ratio, CI = Confidence Interval

Model 1: Unadjusted model.

Model 2: Adjusted for Age, genetic sex, ethnicity, educational attainment, townsend deprivation index and assessment centre.

Model 3: Adjusted for confounders in model 2 along with smoking status, alcohol consumption, hypertension, diabetes mellitus, anticoagulant use and LDL/HDL ratio.

| Type | Model 1 | | | | Model 2 | | | | Model 3 | | | |
| --- | --- | --- | --- | --- | --- | --- | --- | --- | --- | --- | --- | --- |
| HR1 (95% CI1) | P-value | HR (95% CI)  for trend | P for trend | HR (95% CI) | P-value | HR (95% CI)  for trend | P for trend | HR (95% CI) | P-value | HR (95% CI)  for trend | P for trend |
| CTI index |  |  |  |  |  |  |  |  |  |  |  |  |
| Q1 | Reference |  | 1.27 (1.17, 1.37) | <.001 | Reference |  | 1.18 (1.09, 1.29) | <.001 | Reference |  | 1.09 (0.99, 1.20) | 0.085 |
| Q2 | 1.61 (1.27, 2.04) | <.001 | 1.38 (1.09, 1.76) | 0.008 | 1.29 (1.01, 1.65) | 0.039 |
| Q3 | 1.48 (1.16, 1.88) | 0.002 | 1.21 (0.94, 1.54) | 0.136 | 1.05 (0.81, 1.36) | 0.696 |
| Q4 | 1.93 (1.53, 2.44) | <.001 | 1.58 (1.25, 2.00) | <.001 | 1.26 (0.97, 1.65) | 0.087 |
| CTI-BMI index |  |  |  |  |  |  |  |  |  |  |  |  |
| Q1 | Reference |  | 1.16 (1.08, 1.24) | <.001 | Reference |  | 1.12 (1.03, 1.21) | 0.005 | Reference |  | 1.00 (0.91, 1.10) | 0.961 |
| Q2 | 1.29 (1.02, 1.64) | 0.031 | 1.06 (0.84, 1.35) | 0.620 | 0.97 (0.76, 1.23) | 0.785 |
| Q3 | 1.43 (1.13, 1.80) | 0.002 | 1.11 (0.88, 1.40) | 0.394 | 0.93 (0.73, 1.20) | 0.585 |
| Q4 | 1.51 (1.20, 1.90) | <.001 | 1.25 (0.99, 1.58) | 0.061 | 0.92 (0.71, 1.20) | 0.549 |
| CTI-Wc index |  |  |  |  |  |  |  |  |  |  |  |  |
| Q1 | Reference |  | 1.33 (1.24, 1.43) | <.001 | Reference |  | 1.22 (1.12, 1.32) | <.001 | Reference |  | 1.10 (1.00, 1.21) | 0.059 |
| Q2 | 1.51 (1.18, 1.93) | 0.001 | 1.22 (0.95, 1.57) | 0.119 | 1.12 (0.87, 1.45) | 0.372 |
| Q3 | 1.62 (1.27, 2.06) | <.001 | 1.17 (0.90, 1.51) | 0.236 | 1.00 (0.76, 1.30) | 0.969 |
| Q4 | 2.15 (1.70, 2.71) | <.001 | 1.54 (1.19, 1.97) | <.001 | 1.16 (0.88, 1.54) | 0.296 |
| CTI-WHtR index |  |  |  |  |  |  |  |  |  |  |  |  |
| Q1 | Reference |  | 1.30 (1.21, 1.40) | <.001 | Reference |  | 1.22 (1.12, 1.32) | <.001 | Reference |  | 1.10 (1.01, 1.21) | 0.037 |
| Q2 | 1.48 (1.16, 1.89) | 0.001 | 1.20 (0.94, 1.54) | 0.143 | 1.10 (0.86, 1.41) | 0.458 |
| Q3 | 1.53 (1.20, 1.95) | <.001 | 1.12 (0.87, 1.44) | 0.378 | 0.96 (0.74, 1.25) | 0.786 |
| Q4 | 2.04 (1.62, 2.57) | <.001 | 1.52 (1.19, 1.93) | <.001 | 1.15 (0.88, 1.51) | 0.307 |

**Table S3：Association of CTI-related indices with stroke in cancer survivors.**

1HR = Hazard Ratio, CI = Confidence Interval

Model 1: Unadjusted model.

Model 2: Adjusted for Age, genetic sex, ethnicity, educational attainment, townsend deprivation index and assessment centre.

Model 3: Adjusted for confounders in model 2 along with smoking status, alcohol consumption, hypertension, diabetes mellitus, anticoagulant use and LDL/HDL ratio.

| Type | Model 1 | | | | Model 2 | | | | Model 3 | | | |
| --- | --- | --- | --- | --- | --- | --- | --- | --- | --- | --- | --- | --- |
| HR1 (95% CI1) | P-value | HR (95% CI)  for trend | P for trend | HR (95% CI) | P-value | HR (95% CI)  for trend | P for trend | HR (95% CI) | P-value | HR (95% CI)  for trend | P for trend |
| CTI index |  |  |  |  |  |  |  |  |  |  |  |  |
| Q1 | Reference |  | 1.43 (1.34, 1.53) | <.001 | Reference |  | 1.33 (1.24, 1.42) | <.001 | Reference |  | 1.34 (1.24, 1.45) | <.001 |
| Q2 | 1.32 (1.07, 1.63) | 0.011 | 1.09 (0.88, 1.35) | 0.448 | 1.11 (0.89, 1.38) | 0.353 |
| Q3 | 1.70 (1.39, 2.09) | <.001 | 1.32 (1.07, 1.62) | 0.009 | 1.35 (1.09, 1.68) | 0.006 |
| Q4 | 2.47 (2.04, 2.99) | <.001 | 1.90 (1.56, 2.30) | <.001 | 1.93 (1.55, 2.40) | <.001 |
| CTI-BMI index |  |  |  |  |  |  |  |  |  |  |  |  |
| Q1 | Reference |  | 1.49 (1.41, 1.57) | <.001 | Reference |  | 1.48 (1.40, 1.57) | <.001 | Reference |  | 1.46 (1.37, 1.55) | <.001 |
| Q2 | 1.53 (1.23, 1.91) | <.001 | 1.23 (0.98, 1.53) | 0.071 | 1.26 (1.00, 1.58) | 0.046 |
| Q3 | 1.73 (1.40, 2.15) | <.001 | 1.26 (1.01, 1.57) | 0.039 | 1.29 (1.02, 1.62) | 0.032 |
| Q4 | 3.02 (2.48, 3.69) | <.001 | 2.36 (1.93, 2.90) | <.001 | 2.27 (1.82, 2.84) | <.001 |
| CTI-Wc index |  |  |  |  |  |  |  |  |  |  |  |  |
| Q1 | Reference |  | 1.68 (1.58, 1.78) | <.001 | Reference |  | 1.55 (1.45, 1.66) | <.001 | Reference |  | 1.55 (1.44, 1.67) | <.001 |
| Q2 | 1.47 (1.17, 1.86) | <.001 | 1.17 (0.93, 1.48) | 0.185 | 1.19 (0.94, 1.51) | 0.144 |
| Q3 | 1.92 (1.54, 2.39) | <.001 | 1.33 (1.06, 1.68) | 0.015 | 1.34 (1.05, 1.70) | 0.017 |
| Q4 | 3.58 (2.92, 4.39) | <.001 | 2.42 (1.95, 3.01) | <.001 | 2.35 (1.85, 2.98) | <.001 |
| CTI-WHtR index |  |  |  |  |  |  |  |  |  |  |  |  |
| Q1 | Reference |  | 1.63 (1.53, 1.72) | <.001 | Reference |  | 1.53 (1.43, 1.63) | <.001 | Reference |  | 1.52 (1.42, 1.64) | <.001 |
| Q2 | 1.66 (1.33, 2.08) | <.001 | 1.29 (1.02, 1.61) | 0.030 | 1.31 (1.04, 1.64) | 0.024 |
| Q3 | 1.75 (1.40, 2.19) | <.001 | 1.19 (0.95, 1.50) | 0.130 | 1.21 (0.96, 1.54) | 0.112 |
| Q4 | 3.48 (2.84, 4.27) | <.001 | 2.38 (1.93, 2.93) | <.001 | 2.28 (1.81, 2.87) | <.001 |

**Table S4：Association of CTI-related indices with heart failure in cancer survivors.**

1HR = Hazard Ratio, CI = Confidence Interval

Model 1: Unadjusted model.

Model 2: Adjusted for Age, genetic sex, ethnicity, educational attainment, townsend deprivation index and assessment centre.

Model 3: Adjusted for confounders in model 2 along with smoking status, alcohol consumption, hypertension, diabetes mellitus, anticoagulant use and LDL/HDL ratio.

| Type | Model 1 | | | | Model 2 | | | | Model 3 | | | |
| --- | --- | --- | --- | --- | --- | --- | --- | --- | --- | --- | --- | --- |
| HR1 (95% CI1) | P-value | HR (95% CI)  for trend | P for trend | HR (95% CI) | P-value | HR (95% CI)  for trend | P for trend | HR (95% CI) | P-value | HR (95% CI)  for trend | P for trend |
| CTI index |  |  |  |  |  |  |  |  |  |  |  |  |
| Q1 | Reference |  | 1.36 (1.32, 1.40) | <.001 | Reference |  | 1.28 (1.24, 1.33) | <.001 | Reference |  | 1.32 (1.27, 1.37) | <.001 |
| Q2 | 1.32 (1.20, 1.46) | <.001 | 1.18 (1.07, 1.30) | <.001 | 1.22 (1.11, 1.35) | <.001 |
| Q3 | 1.67 (1.52, 1.83) | <.001 | 1.42 (1.29, 1.56) | <.001 | 1.49 (1.35, 1.65) | <.001 |
| Q4 | 2.18 (1.99, 2.39) | <.001 | 1.83 (1.67, 2.01) | <.001 | 1.92 (1.73, 2.13) | <.001 |
| CTI-BMI index |  |  |  |  |  |  |  |  |  |  |  |  |
| Q1 | Reference |  | 1.19 (1.15, 1.22) | <.001 | Reference |  | 1.14 (1.11, 1.18) | <.001 | Reference |  | 1.13 (1.09, 1.17) | <.001 |
| Q2 | 1.15 (1.05, 1.26) | 0.004 | 0.99 (0.90, 1.09) | 0.798 | 1.00 (0.91, 1.10) | 0.989 |
| Q3 | 1.36 (1.24, 1.48) | <.001 | 1.10 (1.00, 1.20) | 0.050 | 1.10 (1.00, 1.22) | 0.047 |
| Q4 | 1.62 (1.48, 1.77) | <.001 | 1.35 (1.23, 1.47) | <.001 | 1.30 (1.18, 1.44) | <.001 |
| CTI-Wc index |  |  |  |  |  |  |  |  |  |  |  |  |
| Q1 | Reference |  | 1.33 (1.29, 1.37) | <.001 | Reference |  | 1.22 (1.18, 1.26) | <.001 | Reference |  | 1.22 (1.17, 1.26) | <.001 |
| Q2 | 1.38 (1.25, 1.52) | <.001 | 1.18 (1.07, 1.30) | 0.001 | 1.20 (1.08, 1.33) | <.001 |
| Q3 | 1.62 (1.47, 1.78) | <.001 | 1.25 (1.13, 1.38) | <.001 | 1.27 (1.14, 1.41) | <.001 |
| Q4 | 2.15 (1.97, 2.36) | <.001 | 1.61 (1.46, 1.78) | <.001 | 1.59 (1.42, 1.77) | <.001 |
| CTI-WHtR index |  |  |  |  |  |  |  |  |  |  |  |  |
| Q1 | Reference |  | 1.31 (1.27, 1.34) | <.001 | Reference |  | 1.22 (1.18, 1.26) | <.001 | Reference |  | 1.22 (1.18, 1.26) | <.001 |
| Q2 | 1.25 (1.14, 1.38) | <.001 | 1.06 (0.96, 1.17) | 0.223 | 1.09 (0.98, 1.20) | 0.107 |
| Q3 | 1.60 (1.46, 1.76) | <.001 | 1.24 (1.13, 1.37) | <.001 | 1.27 (1.15, 1.41) | <.001 |
| Q4 | 2.01 (1.84, 2.20) | <.001 | 1.55 (1.41, 1.70) | <.001 | 1.54 (1.38, 1.71) | <.001 |

**Table S5：Association of CTI-related indices with all cause mortality in cancer survivors.**

1HR = Hazard Ratio, CI = Confidence Interval

Model 1: Unadjusted model.

Model 2: Adjusted for Age, genetic sex, ethnicity, educational attainment, townsend deprivation index and assessment centre.

Model 3: Adjusted for confounders in model 2 along with smoking status, alcohol consumption, hypertension, diabetes mellitus, anticoagulant use and LDL/HDL ratio.

| Type | Model 1 | | | | Model 2 | | | | Model 3 | | | |
| --- | --- | --- | --- | --- | --- | --- | --- | --- | --- | --- | --- | --- |
| HR1 (95% CI1) | P-value | HR (95% CI)  for trend | P for trend | HR (95% CI) | P-value | HR (95% CI)  for trend | P for trend | HR (95% CI) | P-value | HR (95% CI)  for trend | P for trend |
| CTI index |  |  |  |  |  |  |  |  |  |  |  |  |
| Q1 | Reference |  | 1.68 (1.45, 1.95) | <.001 | Reference |  | 1.52 (1.30, 1.77) | <.001 | Reference |  | 1.38 (1.15, 1.65) | <.001 |
| Q2 | 3.05 (1.70, 5.47) | <.001 | 2.29 (1.27, 4.13) | 0.003 | 2.11 (1.16, 3.84) | 0.014 |
| Q3 | 3.51 (1.97, 6.26) | <.001 | 2.43 (1.36, 4.34) | 0.003 | 2.16 (1.18, 3.94) | 0.012 |
| Q4 | 4.94 (2.82, 8.65) | <.001 | 3.37 (1.91, 5.93) | <.001 | 2.66 (1.44, 4.92) | 0.002 |
| CTI-BMI index |  |  |  |  |  |  |  |  |  |  |  |  |
| Q1 | Reference |  | 1.61 (1.44, 1.80) | <.001 | Reference |  | 1.68 (1.47, 1.93) | <.001 | Reference |  | 1.52 (1.31, 1.77) | <.001 |
| Q2 | 2.61 (1.41, 4.85) | 0.002 | 1.80 (0.97, 3.34) | 0.065 | 1.67 (0.89, 3.14) | 0.108 |
| Q3 | 3.64 (2.01, 6.60) | <.001 | 2.16 (1.18, 3.93) | 0.012 | 1.88 (1.01, 3.49) | 0.047 |
| Q4 | 5.62 (3.20, 10.00) | <.001 | 3.82 (2.15, 6.81) | <.001 | 2.82 (1.52, 5.25) | 0.001 |
| CTI-Wc index |  |  |  |  |  |  |  |  |  |  |  |  |
| Q1 | Reference |  | 2.05 (1.80, 2.33) | <.001 | Reference |  | 1.78 (1.53, 2.07) | <.001 | Reference |  | 1.59 (1.34, 1.89) | <.001 |
| Q2 | 3.30 (1.62, 6.72) | 0.005 | 2.08 (1.01, 4.27) | 0.045 | 1.93 (0.93, 3.98) | 0.075 |
| Q3 | 5.33 (2.70, 10.50) | <.001 | 2.51 (1.25, 5.07) | 0.010 | 2.08 (1.01, 4.27) | 0.045 |
| Q4 | 9.08 (4.70, 17.50) | <.001 | 3.92 (1.98, 7.78) | <.001 | 2.76 (1.34, 5.69) | 0.006 |
| CTI-WHtR index |  |  |  |  |  |  |  |  |  |  |  |  |
| Q1 | Reference |  | 1.92 (1.69, 2.19) | <.001 | Reference |  | 1.83 (1.58, 2.12) | <.001 | Reference |  | 1.66 (1.41, 1.96) | <.001 |
| Q2 | 4.07 (1.96, 8.44) | <.001 | 2.63 (1.26, 5.50) | 0.010 | 2.44 (1.16, 5.13) | 0.018 |
| Q3 | 5.91 (2.90, 12.00) | <.001 | 3.05 (1.48, 6.27) | 0.002 | 2.65 (1.27, 5.54) | 0.010 |
| Q4 | 9.57 (4.80, 19.10) | <.001 | 5.08 (2.52, 10.30) | <.001 | 3.71 (1.77, 7.79) | <.001 |

**Table S6：Association of CTI-related indices with CVD-related mortality in cancer survivors.**

1HR = Hazard Ratio, CI = Confidence Interval

Model 1: Unadjusted model.

Model 2: Adjusted for Age, genetic sex, ethnicity, educational attainment, townsend deprivation index and assessment centre.

Model 3: Adjusted for confounders in model 2 along with smoking status, alcohol consumption, hypertension, diabetes mellitus, anticoagulant use and LDL/HDL ratio.

|  | AUC (95%CI) | p value | NRI (95%CI) | p value | IDI (95%CI) | p value |
| --- | --- | --- | --- | --- | --- | --- |
| basic model | 0.686 (0.675-0.696) | Reference | Reference |  | Reference |  |
| basic model + CTI | 0.687 (0.677-0.698) | 0.126 | 0.069 (0.050-0.087) | <.001 | 0.004 (0.002-0.007) | <.001 |
| basic model + CTI-BMI | 0.694 (0.684-0.705) | <.001 | 0.094 (0.067-0.125) | <.001 | 0.009 (0.005-0.014) | <.001 |
| basic model + CTI-WC | 0.694 (0.684-0.705) | <.001 | 0.102 (0.086-0.124) | <.001 | 0.006 (0.003-0.009) | <.001 |
| basic model + CTI-WHtR | 0.695 (0.684-0.705) | <.001 | 0.108 (0.079-0.134) | <.001 | 0.012 (0.007-0.017) | <.001 |

**Table S7: Predictive performance of CTI and its obesity-related derivatives for CVD risk**

The basic model was adjusted for age, genetic sex, ethnicity, assessment centre, educational attainment, smoking status, alcohol consumption, Socioeconomic status, HBA1c, HDL and LDL.

|  | AUC (95%CI) | p value | NRI (95%CI) | p value | IDI (95%CI) | p value |
| --- | --- | --- | --- | --- | --- | --- |
| basic model | 0.668 (0.657-0.679) | Reference | Reference |  | Reference |  |
| basic model + CTI | 0.670 (0.659-0.681) | <.001 | 0.034 (-0.008-0.067) | 0.118 | 0.000 (0.000-0.001) | 0.157 |
| basic model + CTI-BMI | 0.669 (0.658-0.680) | <.001 | 0.025 (-0.038-0.064) | 0.706 | 0.000 (0.000-0.001) | 0.471 |
| basic model + CTI-WC | 0.675 (0.664-0.686) | <.001 | 0.041 (-0.009-0.087) | 0.118 | 0.000 (0.000-0.002) | <.001 |
| basic model + CTI-WHtR | 0.676 (0.665-0.687) | <.001 | 0.048 (0.003-0.095) | <.001 | 0.001 (0.000-0.002) | <.001 |

**Table S8: Predictive performance of CTI and its obesity-related derivatives for stroke risk**

The basic model was adjusted for age, genetic sex, ethnicity, assessment centre, educational attainment, smoking status, alcohol consumption, Socioeconomic status, HBA1c, HDL and LDL.

|  | AUC (95%CI) | p value | NRI (95%CI) | p value | IDI (95%CI) | p value |
| --- | --- | --- | --- | --- | --- | --- |
| basic model | 0.670 (0.659-0.681) | Reference | Reference |  | Reference |  |
| basic model + CTI | 0.671 (0.660-0.682) | 0.501 | 0.110 (0.076-0.139) | <.001 | 0.004 (0.002-0.007) | <.001 |
| basic model + CTI-BMI | 0.679 (0.668-0.690) | <.001 | 0.154 (0.119-0.185) | <.001 | 0.012 (0.008-0.016) | <.001 |
| basic model + CTI-WC | 0.679 (0.668-0.690) | 0.001 | 0.140 (0.099-0.174) | <.001 | 0.013 (0.008-0.018) | <.001 |
| basic model + CTI-WHtR | 0.680 (0.670-0.691) | <.001 | 0.158 (0.111-0.192) | <.001 | 0.013 (0.008-0.018) | <.001 |

**Table S9: Predictive performance of CTI and its obesity-related derivatives for heart failure risk**

The basic model was adjusted for age, genetic sex, ethnicity, assessment centre, educational attainment, smoking status, alcohol consumption, Socioeconomic status, HBA1c, HDL and LDL.

|  | AUC (95%CI) | p value | NRI (95%CI) | p value | IDI (95%CI) | p value |
| --- | --- | --- | --- | --- | --- | --- |
| basic model | 0.668 (0.657-0.679) | Reference | Reference |  | Reference |  |
| basic model + CTI | 0.663 (0.653-0.674) | 0.136 | 0.105 (0.081-0.124) | <.001 | 0.012 (0.008-0.016) | <.001 |
| basic model + CTI-BMI | 0.676 (0.665-0.687) | <.001 | 0.052 (0.036-0.068) | <.001 | 0.002 (0.001-0.004) | <.001 |
| basic model + CTI-WC | 0.678 (0.667-0.689) | <.001 | 0.072 (0.052-0.099) | <.001 | 0.006 (0.004-0.008) | <.001 |
| basic model + CTI-WHtR | 0.679 (0.668-0.690) | <.001 | 0.077 (0.055-0.096) | <.001 | 0.006 (0.004-0.009) | <.001 |

**Table S10: Predictive performance of CTI and its obesity-related derivatives for all-cause mortality**

The basic model was adjusted for age, genetic sex, ethnicity, assessment centre, educational attainment, smoking status, alcohol consumption, Socioeconomic status, HBA1c, HDL and LDL.

|  | AUC (95%CI) | p value | NRI (95%CI) | p value | IDI (95%CI) | p value |
| --- | --- | --- | --- | --- | --- | --- |
| basic model | 0.675 (0.664-0.686) | Reference | Reference |  | Reference |  |
| basic model + CTI | 0.677 (0.667-0.688) | 0.030 | 0.110 (0.027-0.176) | <.001 | 0.002 (0.000-0.007) | <.001 |
| basic model + CTI-BMI | 0.684 (0.673-0.695) | <.001 | 0.199 (0.054-0.251) | <.001 | 0.008 (0.003-0.020) | <.001 |
| basic model + CTI-WC | 0.685 (0.674-0.695) | <.001 | 0.138 (0.047-0.218) | <.001 | 0.008 (0.003-0.017) | <.001 |
| basic model + CTI-WHtR | 0.686 (0.675-0.696) | <.001 | 0.161 (0.047-0.235) | <.001 | 0.010 (0.003-0.020) | <.001 |

**Table S11: Predictive performance of CTI and its obesity-related derivatives for CVD-related mortality**

The basic model was adjusted for age, genetic sex, ethnicity, assessment centre, educational attainment, smoking status, alcohol consumption, Socioeconomic status, HBA1c, HDL and LDL.

| **Variable** | **Outcome** | **Levels** | **HR** | **Lower** | **Upper** | **P value** | **P for interaction** |
| --- | --- | --- | --- | --- | --- | --- | --- |
| **Age** |  |  |  |  |  |  |  |
| <60 | CVD incidence | Q1 | Reference |  |  |  | 0.207 |
|  |  | Q2 | 1.35 | 1.05 | 1.75 | 0.020 |  |
|  |  | Q3 | 1.51 | 1.16 | 1.95 | 0.002 |  |
|  |  | Q4 | 2.08 | 1.63 | 2.66 | <.001 |  |
| ≥60 | CVD incidence | Q1 | Reference |  |  |  |  |
|  |  | Q2 | 1.18 | 1.01 | 1.37 | 0.034 |  |
|  |  | Q3 | 1.24 | 1.06 | 1.43 | 0.006 |  |
|  |  | Q4 | 1.84 | 1.59 | 2.13 | <.001 |  |
| <60 | Stroke incidence | Q1 | Reference |  |  |  | 0.908 |
|  |  | Q2 | 1.24 | 0.75 | 2.04 | 0.406 |  |
|  |  | Q3 | 1.14 | 0.67 | 1.95 | 0.613 |  |
|  |  | Q4 | 1.42 | 0.85 | 2.37 | 0.179 |  |
| ≥60 | Stroke incidence | Q1 | Reference |  |  |  |  |
|  |  | Q2 | 1.14 | 0.85 | 1.51 | 0.382 |  |
|  |  | Q3 | 1.05 | 0.79 | 1.40 | 0.748 |  |
|  |  | Q4 | 1.29 | 0.98 | 1.72 | 0.073 |  |
| <60 | HF incidence | Q1 | Reference |  |  |  | 0.056 |
|  |  | Q2 | 1.53 | 0.93 | 2.50 | 0.092 |  |
|  |  | Q3 | 2.08 | 1.28 | 3.36 | 0.003 |  |
|  |  | Q4 | 3.04 | 1.93 | 4.79 | <.001 |  |
| ≥60 | HF incidence | Q1 | Reference |  |  |  |  |
|  |  | Q2 | 1.20 | 0.93 | 1.55 | 0.172 |  |
|  |  | Q3 | 1.01 | 0.78 | 1.32 | 0.924 |  |
|  |  | Q4 | 2.00 | 1.57 | 2.55 | <.001 |  |
| <60 | All-cause mortality | Q1 | Reference |  |  |  | 0.001 |
|  |  | Q2 | 1.07 | 0.89 | 1.29 | 0.451 |  |
|  |  | Q3 | 1.67 | 1.40 | 1.99 | <.001 |  |
|  |  | Q4 | 1.94 | 1.63 | 2.30 | <.001 |  |
| ≥60 | All-cause mortality | Q1 | Reference |  |  |  |  |
|  |  | Q2 | 1.06 | 0.94 | 1.19 | 0.339 |  |
|  |  | Q3 | 1.16 | 1.03 | 1.30 | 0.015 |  |
|  |  | Q4 | 1.43 | 1.28 | 1.61 | <.001 |  |
| <60 | CVD mortality | Q1 | Reference |  |  |  | 0.072 |
|  |  | Q2 | 1.02 | 0.14 | 7.33 | 0.988 |  |
|  |  | Q3 | 5.71 | 1.22 | 26.74 | 0.027 |  |
|  |  | Q4 | 5.03 | 1.05 | 24.16 | 0.044 |  |
| ≥60 | CVD mortality | Q1 | Reference |  |  |  |  |
|  |  | Q2 | 2.80 | 1.23 | 6.34 | 0.014 |  |
|  |  | Q3 | 2.61 | 1.15 | 5.88 | 0.021 |  |
|  |  | Q4 | 4.26 | 1.92 | 9.46 | <.001 |  |

**Table. S12** Association between CTI-WHtR and total CVD, stroke, heart failure, all-cause mortality, and CVD mortality in age subgroups. The model was adjusted for age, genetic sex, ethnicity, smoking status, alcohol consumption, hypertension, diabetes mellitus and anticoagulant use. (excluding the variable for subgroup stratification)

| **Variable** | **Outcome** | **Levels** | **HR** | **Lower** | **Upper** | **P value** | **P for interaction** |
| --- | --- | --- | --- | --- | --- | --- | --- |
| **Genetic sex** |  |  |  |  |  |  |  |
| Female | CVD incidence | Q1 | Reference |  |  |  | 0.705 |
|  |  | Q2 | 1.29 | 1.09 | 1.54 | 0.003 |  |
|  |  | Q3 | 1.28 | 1.07 | 1.54 | 0.007 |  |
|  |  | Q4 | 2.02 | 1.71 | 2.38 | <.001 |  |
| Male | CVD incidence | Q1 | Reference |  |  |  |  |
|  |  | Q2 | 1.17 | 0.96 | 1.44 | 0.128 |  |
|  |  | Q3 | 1.31 | 1.07 | 1.59 | 0.008 |  |
|  |  | Q4 | 1.85 | 1.52 | 2.24 | <.001 |  |
| Female | Stroke incidence | Q1 | Reference |  |  |  | 0.684 |
|  |  | Q2 | 1.28 | 0.93 | 1.76 | 0.125 |  |
|  |  | Q3 | 1.09 | 0.77 | 1.54 | 0.630 |  |
|  |  | Q4 | 1.47 | 1.06 | 2.03 | 0.020 |  |
| Male | Stroke incidence | Q1 | Reference |  |  |  |  |
|  |  | Q2 | 0.99 | 0.67 | 1.47 | 0.975 |  |
|  |  | Q3 | 1.00 | 0.68 | 1.46 | 0.990 |  |
|  |  | Q4 | 1.16 | 0.79 | 1.71 | 0.442 |  |
| Female | HF incidence | Q1 | Reference |  |  |  | 0.674 |
|  |  | Q2 | 1.35 | 1.00 | 1.82 | 0.052 |  |
|  |  | Q3 | 1.39 | 1.02 | 1.90 | 0.040 |  |
|  |  | Q4 | 2.41 | 1.82 | 3.20 | <.001 |  |
| Male | HF incidence | Q1 | Reference |  |  |  |  |
|  |  | Q2 | 1.19 | 0.83 | 1.70 | 0.336 |  |
|  |  | Q3 | 1.03 | 0.72 | 1.47 | 0.867 |  |
|  |  | Q4 | 2.02 | 1.44 | 2.83 | <.001 |  |
| Female | All-cause mortality | Q1 | Reference |  |  |  | 0.012 |
|  |  | Q2 | 1.22 | 1.07 | 1.38 | 0.002 |  |
|  |  | Q3 | 1.43 | 1.26 | 1.62 | <.001 |  |
|  |  | Q4 | 1.61 | 1.42 | 1.83 | <.001 |  |
| Male | All-cause mortality | Q1 | Reference |  |  |  |  |
|  |  | Q2 | 0.91 | 0.77 | 1.07 | 0.249 |  |
|  |  | Q3 | 1.11 | 0.96 | 1.30 | 0.170 |  |
|  |  | Q4 | 1.45 | 1.24 | 1.68 | <.001 |  |
| Female | CVD mortality | Q1 | Reference |  |  |  | 0.110 |
|  |  | Q2 | 1.91 | 0.76 | 4.83 | 0.171 |  |
|  |  | Q3 | 1.11 | 0.39 | 3.22 | 0.843 |  |
|  |  | Q4 | 2.47 | 1.00 | 6.10 | 0.050 |  |
| Male | CVD mortality | Q1 | Reference |  |  |  |  |
|  |  | Q2 | 5.49 | 1.29 | 23.32 | 0.021 |  |
|  |  | Q3 | 7.96 | 1.92 | 32.98 | 0.004 |  |
|  |  | Q4 | 10.91 | 2.64 | 45.14 | 0.001 |  |

**Table. S13** Association between CTI-WHtR and total CVD, stroke, heart failure, all-cause mortality, and CVD mortality in genetic sex subgroups. The model was adjusted for age, genetic sex, ethnicity, smoking status, alcohol consumption, hypertension, diabetes mellitus and anticoagulant use. (excluding the variable for subgroup stratification)

| **Variable** | **Outcome** | **Levels** | **HR** | **Lower** | **Upper** | **P value** | **P for interaction** |
| --- | --- | --- | --- | --- | --- | --- | --- |
| **Ethnicity** |  |  |  |  |  |  |  |
| Non_white | CVD incidence | Q1 | Reference |  |  |  | 0.846 |
|  |  | Q2 | 0.94 | 0.40 | 2.23 | 0.896 |  |
|  |  | Q3 | 1.54 | 0.70 | 3.40 | 0.288 |  |
|  |  | Q4 | 1.84 | 0.86 | 3.93 | 0.115 |  |
| White | CVD incidence | Q1 | Reference |  |  |  |  |
|  |  | Q2 | 1.25 | 1.09 | 1.42 | 0.001 |  |
|  |  | Q3 | 1.31 | 1.15 | 1.50 | <.001 |  |
|  |  | Q4 | 1.94 | 1.71 | 2.20 | <.001 |  |
| Non_white | Stroke incidence | Q1 | Reference |  |  |  | 0.629 |
|  |  | Q2 | 0.78 | 0.11 | 5.78 | 0.808 |  |
|  |  | Q3 | 1.85 | 0.35 | 9.80 | 0.470 |  |
|  |  | Q4 | 1.94 | 0.36 | 10.35 | 0.436 |  |
| White | Stroke incidence | Q1 | Reference |  |  |  |  |
|  |  | Q2 | 1.17 | 0.91 | 1.51 | 0.207 |  |
|  |  | Q3 | 1.06 | 0.82 | 1.37 | 0.645 |  |
|  |  | Q4 | 1.32 | 1.02 | 1.69 | 0.031 |  |
| Non_white | HF incidence | Q1 | Reference |  |  |  | 0.814 |
|  |  | Q2 | 1.17 | 0.31 | 4.36 | 0.818 |  |
|  |  | Q3 | 0.70 | 0.17 | 2.83 | 0.615 |  |
|  |  | Q4 | 1.38 | 0.40 | 4.69 | 0.611 |  |
| White | HF incidence | Q1 | Reference |  |  |  |  |
|  |  | Q2 | 1.30 | 1.03 | 1.64 | 0.027 |  |
|  |  | Q3 | 1.22 | 0.97 | 1.55 | 0.092 |  |
|  |  | Q4 | 2.29 | 1.84 | 2.85 | <.001 |  |
| Non_white | All-cause mortality | Q1 | Reference |  |  |  | 0.389 |
|  |  | Q2 | 0.77 | 0.40 | 1.49 | 0.442 |  |
|  |  | Q3 | 1.54 | 0.86 | 2.75 | 0.150 |  |
|  |  | Q4 | 1.44 | 0.79 | 2.63 | 0.235 |  |
| White | All-cause mortality | Q1 | Reference |  |  |  |  |
|  |  | Q2 | 1.09 | 0.99 | 1.21 | 0.083 |  |
|  |  | Q3 | 1.28 | 1.46 | 1.42 | <.001 |  |
|  |  | Q4 | 1.57 | 1.43 | 1.74 | <.001 |  |
| Non_white | CVD mortality | Q1 | Reference |  |  |  | 0.257 |
|  |  | Q2 | - | - | - | - |  |
|  |  | Q3 | - | - | - | - |  |
|  |  | Q4 | - | - | - | - |  |
| White | CVD mortality | Q1 | Reference |  |  |  |  |
|  |  | Q2 | 2.59 | 1.24 | 5.40 | 0.012 |  |
|  |  | Q3 | 2.90 | 1.41 | 6.00 | 0.004 |  |
|  |  | Q4 | 4.27 | 2.09 | 8.72 | <.001 |  |

**Table. S14** Association between CTI-WHtR and total CVD, stroke, heart failure, all-cause mortality, and CVD mortality in ethnicity subgroups. The model was adjusted for age, genetic sex, ethnicity, smoking status, alcohol consumption, hypertension, diabetes mellitus and anticoagulant use. (excluding the variable for subgroup stratification)

| **Variable** | **Outcome** | **Levels** | **HR** | **Lower** | **Upper** | **P value** | **P for interaction** |
| --- | --- | --- | --- | --- | --- | --- | --- |
| **Smoking status** |  |  |  |  |  |  |  |
| No | CVD incidence | Q1 | Reference |  |  |  | 0.078 |
|  |  | Q2 | 1.27 | 1.10 | 1.45 | 0.001 |  |
|  |  | Q3 | 1.33 | 1.16 | 1.53 | <.001 |  |
|  |  | Q4 | 2.03 | 1.78 | 2.32 | <.001 |  |
| Yes | CVD incidence | Q1 | Reference |  |  |  |  |
|  |  | Q2 | 1.02 | 0.69 | 1.51 | 0.936 |  |
|  |  | Q3 | 1.15 | 0.78 | 1.68 | 0.485 |  |
|  |  | Q4 | 1.30 | 0.90 | 1.87 | 0.166 |  |
| No | Stroke incidence | Q1 | Reference |  |  |  | 0.255 |
|  |  | Q2 | 1.23 | 0.95 | 1.50 | 0.115 |  |
|  |  | Q3 | 1.07 | 0.82 | 1.39 | 0.638 |  |
|  |  | Q4 | 1.33 | 1.02 | 1.73 | 0.035 |  |
| Yes | Stroke incidence | Q1 | Reference |  |  |  |  |
|  |  | Q2 | 0.64 | 0.27 | 1.50 | 0.305 |  |
|  |  | Q3 | 1.13 | 0.53 | 2.37 | 0.756 |  |
|  |  | Q4 | 1.33 | 0.65 | 2.73 | 0.433 |  |
| No | HF incidence | Q1 | Reference |  |  |  | 0.546 |
|  |  | Q2 | 1.25 | 0.98 | 1.58 | 0.071 |  |
|  |  | Q3 | 1.17 | 0.92 | 1.49 | 0.208 |  |
|  |  | Q4 | 2.25 | 1.79 | 2.81 | <.001 |  |
| Yes | HF incidence | Q1 | Reference |  |  |  |  |
|  |  | Q2 | 1.80 | 0.85 | 3.83 | 0.124 |  |
|  |  | Q3 | 1.50 | 0.70 | 3.23 | 0.295 |  |
|  |  | Q4 | 2.29 | 1.12 | 4.70 | 0.023 |  |
| No | All-cause mortality | Q1 | Reference |  |  |  | 0.006 |
|  |  | Q2 | 1.10 | 0.99 | 1.23 | 0.068 |  |
|  |  | Q3 | 1.31 | 1.18 | 1.46 | <.001 |  |
|  |  | Q4 | 1.67 | 1.51 | 1.85 | <.001 |  |
| Yes | All-cause mortality | Q1 | Reference |  |  |  |  |
|  |  | Q2 | 0.97 | 0.74 | 1.26 | 0.816 |  |
|  |  | Q3 | 1.12 | 0.87 | 1.45 | 0.385 |  |
|  |  | Q4 | 1.09 | 0.84 | 1.40 | 0.525 |  |
| No | CVD mortality | Q1 | Reference |  |  |  | 0.210 |
|  |  | Q2 | 2.40 | 1.09 | 5.26 | 0.029 |  |
|  |  | Q3 | 2.78 | 1.29 | 6.00 | 0.009 |  |
|  |  | Q4 | 4.64 | 2.18 | 9.85 | <.001 |  |
| Yes | CVD mortality | Q1 | Reference |  |  |  |  |
|  |  | Q2 | 3.98 | 0.47 | 33.75 | 0.205 |  |
|  |  | Q3 | 4.60 | 0.56 | 37.74 | 0.155 |  |
|  |  | Q4 | 2.98 | 0.35 | 25.53 | 0.319 |  |

**Table. S15** Association between CTI-WHtR and total CVD, stroke, heart failure, all-cause mortality, and CVD mortality in smoking status subgroups. The model was adjusted for age, genetic sex, ethnicity, smoking status, alcohol consumption, hypertension, diabetes mellitus and anticoagulant use. (excluding the variable for subgroup stratification)

| **Variable** | **Outcome** | **Levels** | **HR** | **Lower** | **Upper** | **P value** | **P for interaction** |
| --- | --- | --- | --- | --- | --- | --- | --- |
| **Alcohol consumption** |  |  |  |  |  |  |  |
| No | CVD incidence | Q1 | Reference |  |  |  | 0.134 |
|  |  | Q2 | 1.28 | 0.84 | 1.96 | 0.255 |  |
|  |  | Q3 | 0.91 | 0.56 | 1.40 | 0.656 |  |
|  |  | Q4 | 1.56 | 1.06 | 2.31 | 0.026 |  |
| Yes | CVD incidence | Q1 | Reference |  |  |  |  |
|  |  | Q2 | 1.24 | 1.08 | 1.42 | 0.002 |  |
|  |  | Q3 | 1.36 | 1.19 | 1.56 | <.001 |  |
|  |  | Q4 | 1.97 | 1.73 | 2.25 | <.001 |  |
| No | Stroke incidence | Q1 | Reference |  |  |  | 0.993 |
|  |  | Q2 | 0.97 | 0.42 | 2.25 | 0.941 |  |
|  |  | Q3 | 0.96 | 0.42 | 2.18 | 0.921 |  |
|  |  | Q4 | 1.04 | 0.48 | 2.27 | 0.918 |  |
| Yes | Stroke incidence | Q1 | Reference |  |  |  |  |
|  |  | Q2 | 1.19 | 0.92 | 1.54 | 0.193 |  |
|  |  | Q3 | 1.10 | 0.84 | 1.43 | 0.486 |  |
|  |  | Q4 | 1.37 | 1.06 | 1.78 | 0.017 |  |
| No | HF incidence | Q1 | Reference |  |  |  | 0.395 |
|  |  | Q2 | 1.23 | 0.63 | 2.40 | 0.544 |  |
|  |  | Q3 | 0.72 | 0.35 | 1.47 | 0.361 |  |
|  |  | Q4 | 1.83 | 1.01 | 1.33 | 0.046 |  |
| Yes | HF incidence | Q1 | Reference |  |  |  |  |
|  |  | Q2 | 1.30 | 1.02 | 1.66 | 0.035 |  |
|  |  | Q3 | 1.27 | 0.99 | 1.62 | 0.058 |  |
|  |  | Q4 | 2.30 | 1.83 | 2.89 | <.001 |  |
| No | All-cause mortality | Q1 | Reference |  |  |  | 0.306 |
|  |  | Q2 | 0.94 | 0.69 | 1.28 | 0.688 |  |
|  |  | Q3 | 1.04 | 0.77 | 1.39 | 0.801 |  |
|  |  | Q4 | 1.21 | 0.91 | 1.59 | 0.188 |  |
| Yes | All-cause mortality | Q1 | Reference |  |  |  |  |
|  |  | Q2 | 1.11 | 1.00 | 1.23 | 0.055 |  |
|  |  | Q3 | 1.33 | 1.20 | 1.47 | <.001 |  |
|  |  | Q4 | 1.63 | 1.47 | 1.81 | <.001 |  |
| No | CVD mortality | Q1 | Reference |  |  |  | 0.219 |
|  |  | Q2 | 0.76 | 0.15 | 3.94 | 0.749 |  |
|  |  | Q3 | 1.06 | 0.24 | 4.65 | 0.936 |  |
|  |  | Q4 | 1.06 | 0.25 | 4.49 | 0.937 |  |
| Yes | CVD mortality | Q1 | Reference |  |  |  |  |
|  |  | Q2 | 3.53 | 1.47 | 8.47 | 0.005 |  |
|  |  | Q3 | 4.03 | 1.70 | 9.57 | 0.002 |  |
|  |  | Q4 | 6.22 | 2.65 | 14.58 | <.001 |  |

**Table. S16** Association between CTI-WHtR and total CVD, stroke, heart failure, all-cause mortality, and CVD mortality in alcohol consumption subgroups. The model was adjusted for age, genetic sex, ethnicity, smoking status, alcohol consumption, hypertension, diabetes mellitus and anticoagulant use. (excluding the variable for subgroup stratification)

| **Variable** | **Outcome** | **Levels** | **HR** | **Lower** | **Upper** | **P value** | **P for interaction** |
| --- | --- | --- | --- | --- | --- | --- | --- |
| **Hypertension** |  |  |  |  |  |  |  |
| No | CVD incidence | Q1 | Reference |  |  |  | 0.235 |
|  |  | Q2 | 1.15 | 0.93 | 1.43 | 0.189 |  |
|  |  | Q3 | 1.42 | 1.14 | 1.76 | 0.002 |  |
|  |  | Q4 | 2.13 | 1.71 | 2.65 | <.001 |  |
| Yes | CVD incidence | Q1 | Reference |  |  |  |  |
|  |  | Q2 | 1.25 | 1.06 | 1.48 | 0.008 |  |
|  |  | Q3 | 1.26 | 1.07 | 1.49 | 0.006 |  |
|  |  | Q4 | 1.86 | 1.59 | 2.17 | <.001 |  |
| No | Stroke incidence | Q1 | Reference |  |  |  | 0.174 |
|  |  | Q2 | 1.28 | 0.87 | 1.88 | 0.205 |  |
|  |  | Q3 | 0.77 | 0.48 | 1.22 | 0.267 |  |
|  |  | Q4 | 1.39 | 0.89 | 2.17 | 0.149 |  |
| Yes | Stroke incidence | Q1 | Reference |  |  |  |  |
|  |  | Q2 | 1.12 | 0.81 | 1.55 | 0.503 |  |
|  |  | Q3 | 1.19 | 0.86 | 1.63 | 0.291 |  |
|  |  | Q4 | 1.34 | 0.99 | 1.82 | 0.062 |  |
| No | HF incidence | Q1 | Reference |  |  |  | 0.682 |
|  |  | Q2 | 1.27 | 0.88 | 1.82 | 0.201 |  |
|  |  | Q3 | 1.31 | 0.89 | 1.91 | 0.169 |  |
|  |  | Q4 | 2.03 | 1.38 | 2.97 | <.001 |  |
| Yes | HF incidence | Q1 | Reference |  |  |  |  |
|  |  | Q2 | 1.30 | 0.96 | 1.75 | 0.086 |  |
|  |  | Q3 | 1.16 | 0.86 | 1.57 | 0.318 |  |
|  |  | Q4 | 2.29 | 1.74 | 3.01 | <.001 |  |
| No | All-cause mortality | Q1 | Reference |  |  |  | 0.013 |
|  |  | Q2 | 1.23 | 1.06 | 1.42 | 0.005 |  |
|  |  | Q3 | 1.43 | 1.24 | 1.66 | <.001 |  |
|  |  | Q4 | 1.84 | 1.58 | 2.15 | <.001 |  |
| Yes | All-cause mortality | Q1 | Reference |  |  |  |  |
|  |  | Q2 | 0.95 | 0.83 | 1.08 | 0.431 |  |
|  |  | Q3 | 1.14 | 1.00 | 1.30 | 0.046 |  |
|  |  | Q4 | 1.38 | 1.22 | 1.56 | <.001 |  |
| No | CVD mortality | Q1 | Reference |  |  |  | 0.464 |
|  |  | Q2 | 2.66 | 0.70 | 10.13 | 0.151 |  |
|  |  | Q3 | 4.97 | 1.40 | 17.61 | 0.013 |  |
|  |  | Q4 | 5.04 | 1.34 | 19.02 | 0.017 |  |
| Yes | CVD mortality | Q1 | Reference |  |  |  |  |
|  |  | Q2 | 2.39 | 0.99 | 5.79 | 0.054 |  |
|  |  | Q3 | 2.39 | 1.00 | 5.70 | 0.050 |  |
|  |  | Q4 | 3.94 | 1.69 | 9.17 | 0.001 |  |

**Table. S17** Association between CTI-WHtR and total CVD, stroke, heart failure, all-cause mortality, and CVD mortality in hypertension subgroups. The model was adjusted for age, genetic sex, ethnicity, smoking status, alcohol consumption, hypertension, diabetes mellitus and anticoagulant use. (excluding the variable for subgroup stratification)

| **Variable** | **Outcome** | **Levels** | **HR** | **Lower** | **Upper** | **P value** | **P for interaction** |
| --- | --- | --- | --- | --- | --- | --- | --- |
| **Diabetes mellitus** |  |  |  |  |  |  |  |
| No | CVD incidence | Q1 | Reference |  |  |  | 0.762 |
|  |  | Q2 | 1.26 | 1.10 | 1.43 | 0.001 |  |
|  |  | Q3 | 1.32 | 1.16 | 1.51 | <.001 |  |
|  |  | Q4 | 1.94 | 1.71 | 2.21 | <.001 |  |
| Yes | CVD incidence | Q1 | Reference |  |  |  |  |
|  |  | Q2 | 0.82 | 0.40 | 1.69 | 0.592 |  |
|  |  | Q3 | 1.11 | 0.58 | 2.10 | 0.756 |  |
|  |  | Q4 | 1.63 | 0.90 | 2.95 | 0.110 |  |
| No | Stroke incidence | Q1 | Reference |  |  |  | 0.816 |
|  |  | Q2 | 1.15 | 0.90 | 1.48 | 0.270 |  |
|  |  | Q3 | 1.05 | 0.81 | 1.36 | 0.730 |  |
|  |  | Q4 | 1.32 | 1.03 | 1.71 | 0.030 |  |
| Yes | Stroke incidence | Q1 | Reference |  |  |  |  |
|  |  | Q2 | 1.72 | 0.35 | 8.41 | 0.501 |  |
|  |  | Q3 | 1.92 | 0.43 | 8.52 | 0.393 |  |
|  |  | Q4 | 1.93 | 0.46 | 8.10 | 0.369 |  |
| No | HF incidence | Q1 | Reference |  |  |  | 0.262 |
|  |  | Q2 | 1.34 | 1.06 | 1.69 | 0.014 |  |
|  |  | Q3 | 1.26 | 0.99 | 1.59 | 0.058 |  |
|  |  | Q4 | 2.25 | 1.80 | 2.81 | <.001 |  |
| Yes | HF incidence | Q1 | Reference |  |  |  |  |
|  |  | Q2 | 0.56 | 0.17 | 1.86 | 0.345 |  |
|  |  | Q3 | 0.53 | 0.19 | 1.53 | 0.244 |  |
|  |  | Q4 | 1.53 | 0.61 | 3.84 | 0.362 |  |
| No | All-cause mortality | Q1 | Reference |  |  |  | 0.108 |
|  |  | Q2 | 1.08 | 0.97 | 1.19 | 0.144 |  |
|  |  | Q3 | 1.31 | 1.19 | 1.45 | <.001 |  |
|  |  | Q4 | 1.57 | 1.42 | 1.73 | <.001 |  |
| Yes | All-cause mortality | Q1 | Reference |  |  |  |  |
|  |  | Q2 | 1.21 | 0.68 | 2.17 | 0.519 |  |
|  |  | Q3 | 0.94 | 0.54 | 1.64 | 0.826 |  |
|  |  | Q4 | 1.50 | 0.90 | 2.51 | 0.119 |  |
| No | CVD mortality | Q1 | Reference |  |  |  | 0.076 |
|  |  | Q2 | 2.66 | 1.27 | 5.56 | 0.009 |  |
|  |  | Q3 | 2.92 | 1.40 | 6.06 | 0.004 |  |
|  |  | Q4 | 3.99 | 1.93 | 8.22 | <.001 |  |
| Yes | CVD mortality | Q1 | Reference |  |  |  |  |
|  |  | Q2 | - | - | - | - |  |
|  |  | Q3 | - | - | - | - |  |
|  |  | Q4 | - | - | - | - |  |

**Table. S18** Association between CTI-WHtR and total CVD, stroke, heart failure, all-cause mortality, and CVD mortality in diabetes mellitus subgroups. The model was adjusted for age, genetic sex, ethnicity, smoking status, alcohol consumption, hypertension, diabetes mellitus and anticoagulant use. (excluding the variable for subgroup stratification)

| **Variable** | **Outcome** | **Levels** | **HR** | **Lower** | **Upper** | **P value** | **P for interaction** |
| --- | --- | --- | --- | --- | --- | --- | --- |
| **Anticoagulant use** |  |  |  |  |  |  |  |
| No | CVD incidence | Q1 | Reference |  |  |  | 0.996 |
|  |  | Q2 | 1.22 | 1.06 | 1.41 | 0.006 |  |
|  |  | Q3 | 1.28 | 1.11 | 1.48 | 0.001 |  |
|  |  | Q4 | 1.89 | 1.64 | 2.16 | <.001 |  |
| Yes | CVD incidence | Q1 | Reference |  |  |  |  |
|  |  | Q2 | 1.31 | 0.94 | 1.83 | 0.114 |  |
|  |  | Q3 | 1.44 | 1.05 | 1.99 | 0.026 |  |
|  |  | Q4 | 2.11 | 1.55 | 2.88 | <.001 |  |
| No | Stroke incidence | Q1 | Reference |  |  |  | 0.601 |
|  |  | Q2 | 1.23 | 0.94 | 1.61 | 0.136 |  |
|  |  | Q3 | 1.10 | 0.83 | 1.45 | 0.523 |  |
|  |  | Q4 | 1.29 | 0.98 | 1.70 | 0.072 |  |
| Yes | Stroke incidence | Q1 | Reference |  |  |  |  |
|  |  | Q2 | 0.90 | 0.48 | 1.67 | 0.730 |  |
|  |  | Q3 | 0.99 | 0.54 | 1.79 | 0.962 |  |
|  |  | Q4 | 1.43 | 0.82 | 2.50 | 0.212 |  |
| No | HF incidence | Q1 | Reference |  |  |  | 0.279 |
|  |  | Q2 | 1.35 | 1.05 | 1.73 | 0.019 |  |
|  |  | Q3 | 1.32 | 1.02 | 1.70 | 0.032 |  |
|  |  | Q4 | 2.41 | 1.90 | 3.05 | <.001 |  |
| Yes | HF incidence | Q1 | Reference |  |  |  |  |
|  |  | Q2 | 0.96 | 0.55 | 1.69 | 0.896 |  |
|  |  | Q3 | 0.69 | 0.39 | 1.22 | 0.202 |  |
|  |  | Q4 | 1.47 | 0.89 | 2.45 | 0.135 |  |
| No | All-cause mortality | Q1 | Reference |  |  |  | 0.705 |
|  |  | Q2 | 1.10 | 0.99 | 1.22 | 0.083 |  |
|  |  | Q3 | 1.30 | 1.18 | 1.45 | <.001 |  |
|  |  | Q4 | 1.57 | 1.41 | 1.74 | <.001 |  |
| Yes | All-cause mortality | Q1 | Reference |  |  |  |  |
|  |  | Q2 | 1.00 | 0.74 | 1.35 | 0.991 |  |
|  |  | Q3 | 1.19 | 0.90 | 1.58 | 0.226 |  |
|  |  | Q4 | 1.58 | 1.20 | 2.06 | 0.001 |  |
| No | CVD mortality | Q1 | Reference |  |  |  | 0.044 |
|  |  | Q2 | 4.44 | 1.72 | 11.44 | 0.002 |  |
|  |  | Q3 | 4.39 | 1.70 | 11.29 | 0.002 |  |
|  |  | Q4 | 6.67 | 2.62 | 17.00 | <.001 |  |
| Yes | CVD mortality | Q1 | Reference |  |  |  |  |
|  |  | Q2 | 0.41 | 0.09 | 1.85 | 0.245 |  |
|  |  | Q3 | 1.26 | 0.40 | 3.97 | 0.692 |  |
|  |  | Q4 | 1.73 | 0.58 | 5.18 | 0.324 |  |

**Table. S19** Association between CTI-WHtR and total CVD, stroke, heart failure, all-cause mortality, and CVD mortality in anticoagulant use subgroups. The model was adjusted for age, genetic sex, ethnicity, smoking status, alcohol consumption, hypertension, diabetes mellitus and anticoagulant use. (excluding the variable for subgroup stratification)

| Type | Total CVD events | | | | Stroke events | | | | Heart failure events | | | | All-cause mortality | | | | CVD-related mortality | | | |
| --- | --- | --- | --- | --- | --- | --- | --- | --- | --- | --- | --- | --- | --- | --- | --- | --- | --- | --- | --- | --- |
| HR1 (95% CI1) | P-value | HR (95% CI)  for trend | P for trend | HR (95% CI) | P-value | HR (95% CI)  for trend | P for trend | HR (95% CI) | P-value | HR (95% CI)  for trend | P for trend | HR (95% CI) | P-value | HR (95% CI)  for trend | P for trend | HR (95% CI) | P-value | HR (95% CI)  for trend | P for trend |
| CTI index |  |  |  |  |  |  |  |  |  |  |  |  |  |  |  |  |  |  |  |  |
| Q1 | Reference |  | 1.17 (1.11, 1.22) | <.001 | Reference |  | 1.08 (0.98, 1.19) | 0.116 | Reference |  | 1.33 (1.23, 1.44) | <.001 | Reference |  | 1.27 (1.23, 1.32) | <.001 | Reference |  | 1.39 (1.16, 1.66) | <.001 |
| Q2 | 1.14 (1.00, 1.29) | 0.051 | 1.26 (0.98, 1.62) | 0.066 | 1.09 (0.87, 1.35) | 0.457 | 1.18 (1.07, 1.31) | 0.002 | 2.11 (1.14, 3.91) | 0.018 |
| Q3 | 1.24 (1.09, 1.41) | 0.001 | 1.03 (0.79, 1.35) | 0.812 | 1.30 (1.04, 1.61) | 0.019 | 1.41 (1.27, 1.56) | <.001 | 2.26 (1.22, 4.20) | 0.010 |
| Q4 | 1.46 (1.28, 1.67) | <.001 | 1.27 (0.97, 1.67) | 0.082 | 1.87 (1.50, 2.34) | <.001 | 1.77 (1.59, 1.97) | <.001 | 2.90 (1.54, 5.43) | <.001 |
| CTI-BMI index |  |  |  |  |  |  |  |  |  |  |  |  |  |  |  |  |  |  |  |  |
| Q1 | Reference |  | 1.23 (1.18, 1.28) | <.001 | Reference |  | 0.98 (0.89, 1.08) | 0.706 | Reference |  | 1.46 (1.37, 1.56) | <.001 | Reference |  | 1.12 (1.08, 1.16) | <.001 | Reference |  | 1.55 (1.33, 1.81) | <.001 |
| Q2 | 1.09 (0.96, 1.25) | 0.183 | 0.96 (0.75, 1.22) | 0.723 | 1.26 (1.00, 1.58) | 0.049 | 1.00 (0.90, 1.10) | 0.959 | 1.71 (0.89, 3.28) | 0.105 |
| Q3 | 1.07 (0.93, 1.22) | 0.351 | 0.93 (0.72, 1.19) | 0.550 | 1.26 (1.00, 1.59) | 0.053 | 1.09 (0.98, 1.20) | 0.107 | 1.97 (1.04, 3.74) | 0.038 |
| Q4 | 1.49 (1.30, 1.70) | <.001 | 0.90 (0.69, 1.17) | 0.436 | 2.27 (1.81, 2.84) | <.001 | 1.29 (1.16, 1.43) | <.001 | 3.08 (1.63, 5.84) | <.001 |
| CTI-Wc index |  |  |  |  |  |  |  |  |  |  |  |  |  |  |  |  |  |  |  |  |
| Q1 | Reference |  | 1.28 (1.22, 1.34) | <.001 | Reference |  | 1.08 (0.98, 1.19) | 0.154 | Reference |  | 1.55 (1.44, 1.67) | <.001 | Reference |  | 1.21 (1.16, 1.25) | <.001 | Reference |  | 1.62 (1.36, 1.93) | <.001 |
| Q2 | 1.19 (1.04, 1.37) | 0.013 | 1.20 (0.92, 1.55) | 0.178 | 1.20 (0.94, 1.52) | 0.143 | 1.20 (1.08, 1.33) | <.001 | 2.14 (1.04, 4.54) | 0.048 |
| Q3 | 1.14 (0.99, 1.32) | 0.066 | 0.97 (0.74, 1.28) | 0.837 | 1.33 (1.05, 1.69) | 0.020 | 1.24 (1.11, 1.38) | <.001 | 2.20 (1.04, 4.66) | 0.039 |
| Q4 | 1.64 (1.42, 1.90) | <.001 | 1.19 (0.89, 1.59) | 0.234 | 2.30 (1.81, 2.92) | <.001 | 1.55 (1.38, 1.73) | <.001 | 3.01 (1.42, 6.41) | 0.004 |
| CTI-WHtR index |  |  |  |  |  |  |  |  |  |  |  |  |  |  |  |  |  |  |  |  |
| Q1 | Reference |  | 1.28 (1.22, 1.34) | <.001 | Reference |  | 1.08 (0.99, 1.19) | 0.096 | Reference |  | 1.53 (1.42, 1.64) | <.001 | Reference |  | 1.21 (1.16, 1.25) | <.001 | Reference |  | 1.70 (1.44, 2.01) | <.001 |
| Q2 | 1.16 (1.01, 1.33) | 0.032 | 1.11 (0.86, 1.43) | 0.420 | 1.29 (1.02, 1.63) | 0.031 | 1.08 (0.97, 1.19) | 0.163 | 2.60 (1.19, 5.69) | 0.016 |
| Q3 | 1.14 (0.99, 1.31) | 0.063 | 0.94 (0.72, 1.23) | 0.664 | 1.20 (0.94, 1.53) | 0.137 | 1.24 (1.11, 1.37) | <.001 | 2.98 (1.37, 6.46) | 0.006 |
| Q4 | 1.61 (1.40, 1.85) | <.001 | 1.13 (0.86, 1.49) | 0.369 | 2.19 (1.74, 2.77) | <.001 | 1.49 (1.34, 1.66) | <.001 | 4.16 (1.91, 9.05) | <.001 |

**Table S20：Sensitivity analysis after excluding participants with <1 years follow-up**

1HR = Hazard Ratio, CI = Confidence Interval

Analysis were adjusted for for Age, genetic sex, ethnicity, educational attainment, townsend deprivation index, assessment centre, smoking status, alcohol consumption, hypertension, diabetes mellitus, anticoagulant use and LDL/HDL ratio.

| Type | Total CVD events | | | | Stroke events | | | | Heart failure events | | | | All-cause mortality | | | | CVD-related mortality | | | |
| --- | --- | --- | --- | --- | --- | --- | --- | --- | --- | --- | --- | --- | --- | --- | --- | --- | --- | --- | --- | --- |
| HR1 (95% CI1) | P-value | HR (95% CI)  for trend | P for trend | HR (95% CI) | P-value | HR (95% CI)  for trend | P for trend | HR (95% CI) | P-value | HR (95% CI)  for trend | P for trend | HR (95% CI) | P-value | HR (95% CI)  for trend | P for trend | HR (95% CI) | P-value | HR (95% CI)  for trend | P for trend |
| CTI index |  |  |  |  |  |  |  |  |  |  |  |  |  |  |  |  |  |  |  |  |
| Q1 | Reference |  | 1.16 (1.11, 1.22) | <.001 | Reference |  | 1.07 (0.97, 1.19) | 0.159 | Reference |  | 1.31 (1.21, 1.42) | <.001 | Reference |  | 1.25 (1.20, 1.30) | <.001 | Reference |  | 1.39 (1.16, 1.67) | <.001 |
| Q2 | 1.15 (1.00, 1.31) | 0.044 | 1.31 (1.02, 1.70) | 0.038 | 1.05 (0.84, 1.31) | 0.670 | 1.18 (1.06, 1.31) | 0.003 | 2.13 (1.15, 3.95) | 0.016 |
| Q3 | 1.24 (1.08, 1.42) | 0.002 | 1.04 (0.79, 1.37) | 0.755 | 1.22 (0.98, 1.52) | 0.078 | 1.34 (1.20, 1.49) | <.001 | 2.13 (1.14, 3.98) | 0.017 |
| Q4 | 1.46 (1.27, 1.67) | <.001 | 1.30 (0.98, 1.72) | 0.068 | 1.75 (1.40, 2.19) | <.001 | 1.70 (1.52, 1.90) | <.001 | 2.87 (1.53, 5.40) | 0.001 |
| CTI-BMI index |  |  |  |  |  |  |  |  |  |  |  |  |  |  |  |  |  |  |  |  |
| Q1 | Reference |  | 1.24 (1.18, 1.29) | <.001 | Reference |  | 0.98 (0.89, 1.08) | 0.656 | Reference |  | 1.46 (1.36, 1.56) | <.001 | Reference |  | 1.12 (1.08, 1.17) | <.001 | Reference |  | 1.57 (1.34, 1.83) | <.001 |
| Q2 | 1.10 (0.96, 1.26) | 0.179 | 0.93 (0.72, 1.20) | 0.585 | 1.22 (0.96, 1.54) | 0.102 | 0.97 (0.88, 1.08) | 0.612 | 1.72 (0.90, 3.29) | 0.103 |
| Q3 | 1.06 (0.93, 1.22) | 0.381 | 0.93 (0.71, 1.20) | 0.555 | 1.22 (0.96, 1.55) | 0.097 | 1.06 (0.95, 1.18) | 0.285 | 1.91 (1.00, 3.63) | 0.050 |
| Q4 | 1.49 (1.30, 1.71) | <.001 | 0.88 (0.67, 1.16) | 0.357 | 2.23 (1.77, 2.81) | <.001 | 1.25 (1.12, 1.39) | <.001 | 3.03 (1.59, 5.75) | <.001 |
| CTI-Wc index |  |  |  |  |  |  |  |  |  |  |  |  |  |  |  |  |  |  |  |  |
| Q1 | Reference |  | 1.28 (1.21, 1.34) | <.001 | Reference |  | 1.07 (0.96, 1.18) | 0.216 | Reference |  | 1.55 (1.43, 1.67) | <.001 | Reference |  | 1.20 (1.15, 1.25) | <.001 | Reference |  | 1.64 (1.37, 1.95) | <.001 |
| Q2 | 1.17 (1.01, 1.35) | 0.031 | 1.20 (0.92, 1.56) | 0.188 | 1.23 (0.97, 1.58) | 0.090 | 1.19 (1.07, 1.33) | 0.001 | 2.09 (0.98, 4.45) | 0.056 |
| Q3 | 1.13 (0.97, 1.31) | 0.108 | 0.98 (0.74, 1.31) | 0.912 | 1.28 (1.00, 1.64) | 0.053 | 1.20 (1.07, 1.34) | 0.002 | 2.05 (0.96, 4.37) | 0.063 |
| Q4 | 1.61 (1.38, 1.87) | <.001 | 1.19 (0.89, 1.60) | 0.249 | 2.27 (1.77, 2.90) | <.001 | 1.51 (1.34, 1.70) | <.001 | 3.12 (1.46, 6.65) | 0.003 |
| CTI-WHtR index |  |  |  |  |  |  |  |  |  |  |  |  |  |  |  |  |  |  |  |  |
| Q1 | Reference |  | 1.28 (1.22, 1.34) | <.001 | Reference |  | 1.08 (0.98, 1.19) | 0.145 | Reference |  | 1.52 (1.41, 1.64) | <.001 | Reference |  | 1.20 (1.15, 1.25) | <.001 | Reference |  | 1.72 (1.45, 2.04) | <.001 |
| Q2 | 1.15 (1.00, 1.32) | 0.057 | 1.04 (0.80, 1.36) | 0.770 | 1.26 (0.99, 1.60) | 0.059 | 1.09 (0.98, 1.21) | 0.127 | 2.64 (1.21, 5.77) | 0.015 |
| Q3 | 1.12 (0.97, 1.30) | 0.111 | 0.98 (0.74, 1.28) | 0.863 | 1.17 (0.91, 1.49) | 0.215 | 1.21 (1.08, 1.35) | <.001 | 2.84 (1.30, 6.18) | 0.009 |
| Q4 | 1.61 (1.39, 1.86) | <.001 | 1.11 (0.84, 1.47) | 0.478 | 2.13 (1.68, 2.71) | <.001 | 1.47 (1.31, 1.64) | <.001 | 4.14 (1.90, 6.02) | <.001 |

**Table S21：Sensitivity analysis after excluding participants with <2 years follow-up**

1HR = Hazard Ratio, CI = Confidence Interval

Analysis were adjusted for for Age, genetic sex, ethnicity, educational attainment, townsend deprivation index, assessment centre, smoking status, alcohol consumption, hypertension, diabetes mellitus, anticoagulant use and LDL/HDL ratio.
